# Supplementary material for: Rolling vs. Seasonal PMF: Real-world multi-site and synthetic dataset comparison
Source: Copernicus journal article supplement (doi:10.5194/egusphere-2022-269), 2022-05-30
Supplement: Supplementary file [file egusphere-2022-269-AC1-supplement.pdf]

**Table R1.1. Percentage of m/z 55 attributed by each OA source in each site.**

| %       | HOA       | BBOA | LO-<br>OOA | MO-<br>OOA | COA       | 58-OA | SHIN<br>DOA | WCOA/<br>PCOA/<br>CCOA |
|---------|-----------|------|------------|------------|-----------|-------|-------------|------------------------|
| BCN-PR  | 35        | 17   | 7          | 4          | <b>38</b> | -     | -           | -                      |
| CAO-AMX | <b>64</b> | 17   | 12         | 7          | -         | -     | -           | -                      |
| DUB     | 20        | -    | 5          | 13         | -         | -     | -           | 15/26/20               |
| ATOLL   | <b>54</b> | 23   | 15         | 9          | -         | -     | -           | -                      |
| MGD     | <b>50</b> | 19   | 18         | 11         | -         | 2     | -           | -                      |
| INO     | <b>53</b> | 27   | 13         | 7          | -         | -     | -           | -                      |
| MRS-LCP | 29        | 10   | 13         | 7          | <b>30</b> | -     | 11          | -                      |
| SIR     | <b>67</b> | 4    | 9          | 20         | -         | -     | -           | -                      |
| TAR     | <b>51</b> | 22   | 10         | 16         | -         | -     | -           | -                      |

**Table R.21.2. Percentage of m/z 55 attributed by each OA source for the synthetic dataset profiles.**

| HOA | BBOA | SOA <sub>bb</sub> | SOA <sub>bio</sub> | SOA <sub>tr</sub> |
|-----|------|-------------------|--------------------|-------------------|
| 24  | 25   | 15                | 18                 | 18                |

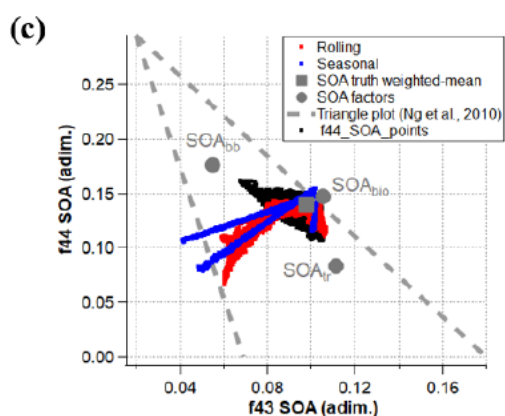

**Figure R1.1. Triangle plot of f44 vs. f43; for rolling PMF (red), seasonal PMF (blue) and truth (black).**
