# Supplementary material for: Rolling vs. Seasonal PMF: Real-world multi-site and synthetic dataset comparison
Source: Copernicus journal article supplement (doi:10.5194/egusphere-2022-269), 2022-05-30
Supplement: Supplementary file [file egusphere-2022-269-AC2-supplement.pdf]

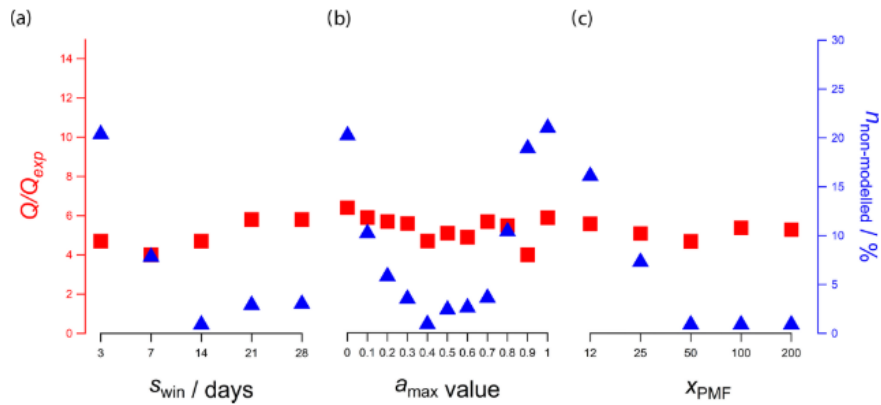

**Figure R2.1.**  $Q/Q_{exp}$  (left axis, red points) and percent of non-modelled points (right axis, blue dots) over the entire dataset as a function of window size ( $s_{win}$ ), maximum a-value ( $a_{max}$ ) and number of PMF repeats per window ( $x_{PMF}$ ). In each plot, two of these parameters are fixed at their optimum values and the third is varied: (a)  $s_{win}$ , (b)  $a_{max}$ , and (c)  $x_{PMF}$ . Optimum values are  $s_{win}=14$  days,  $a_{max}=0.4$ , and  $x_{PMF}=50$ . (From Canonaco et al., 2021).

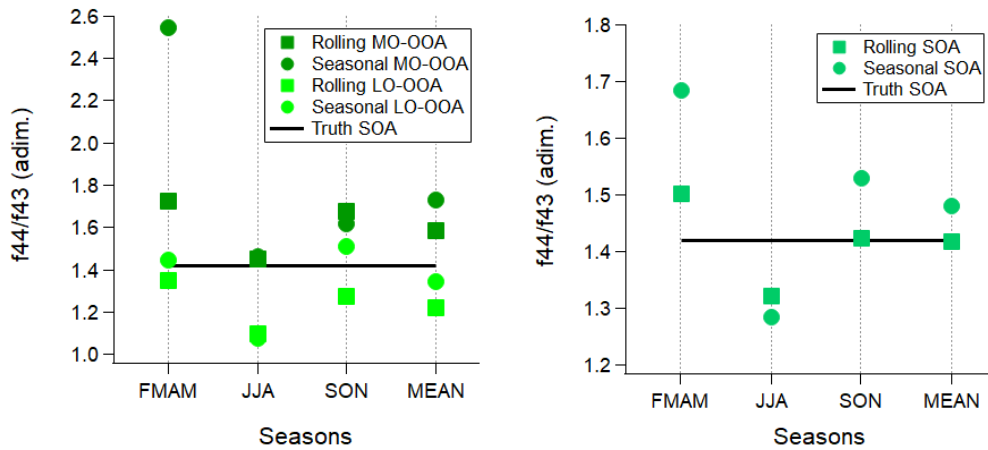

**Figure R2.2.** Rolling and seasonal oxidation ratio ( $f_{44}/f_{43}$ ) of the secondary factors divided into LO-OOA and MO-OOA on the left and mean-weighted OOA on the right.

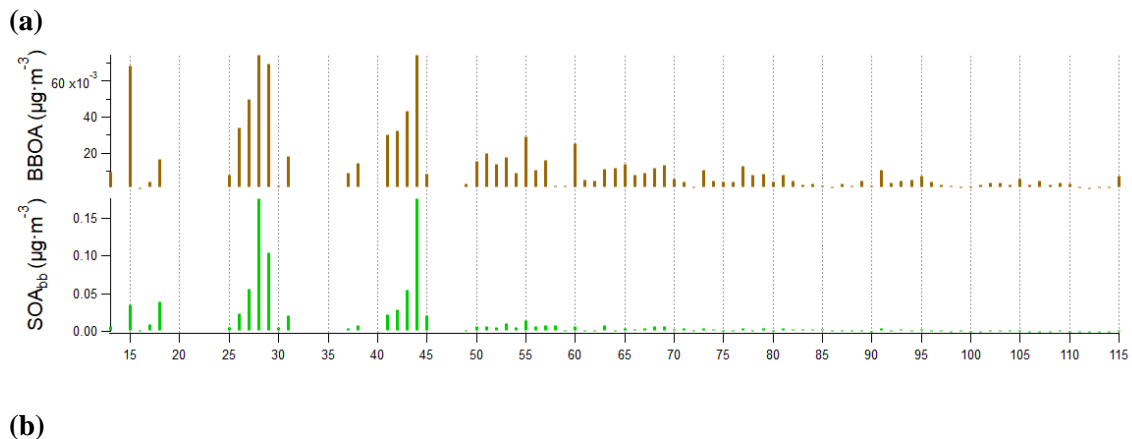

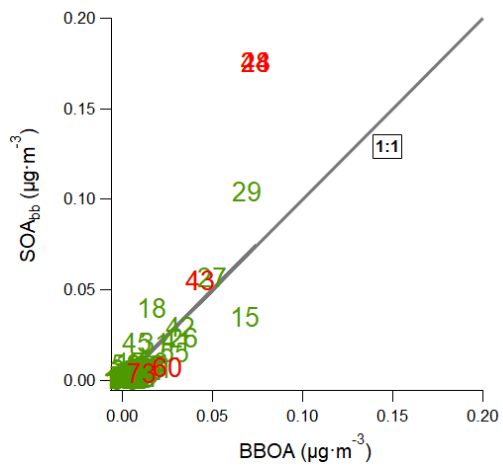

**Figure R2.3. Comparison between BBOA and SOA<sub>bb</sub> profiles depicted as (a) profiles (b) a scatterplot. In the scatterplot, the BBOA key ions are shown in red.**

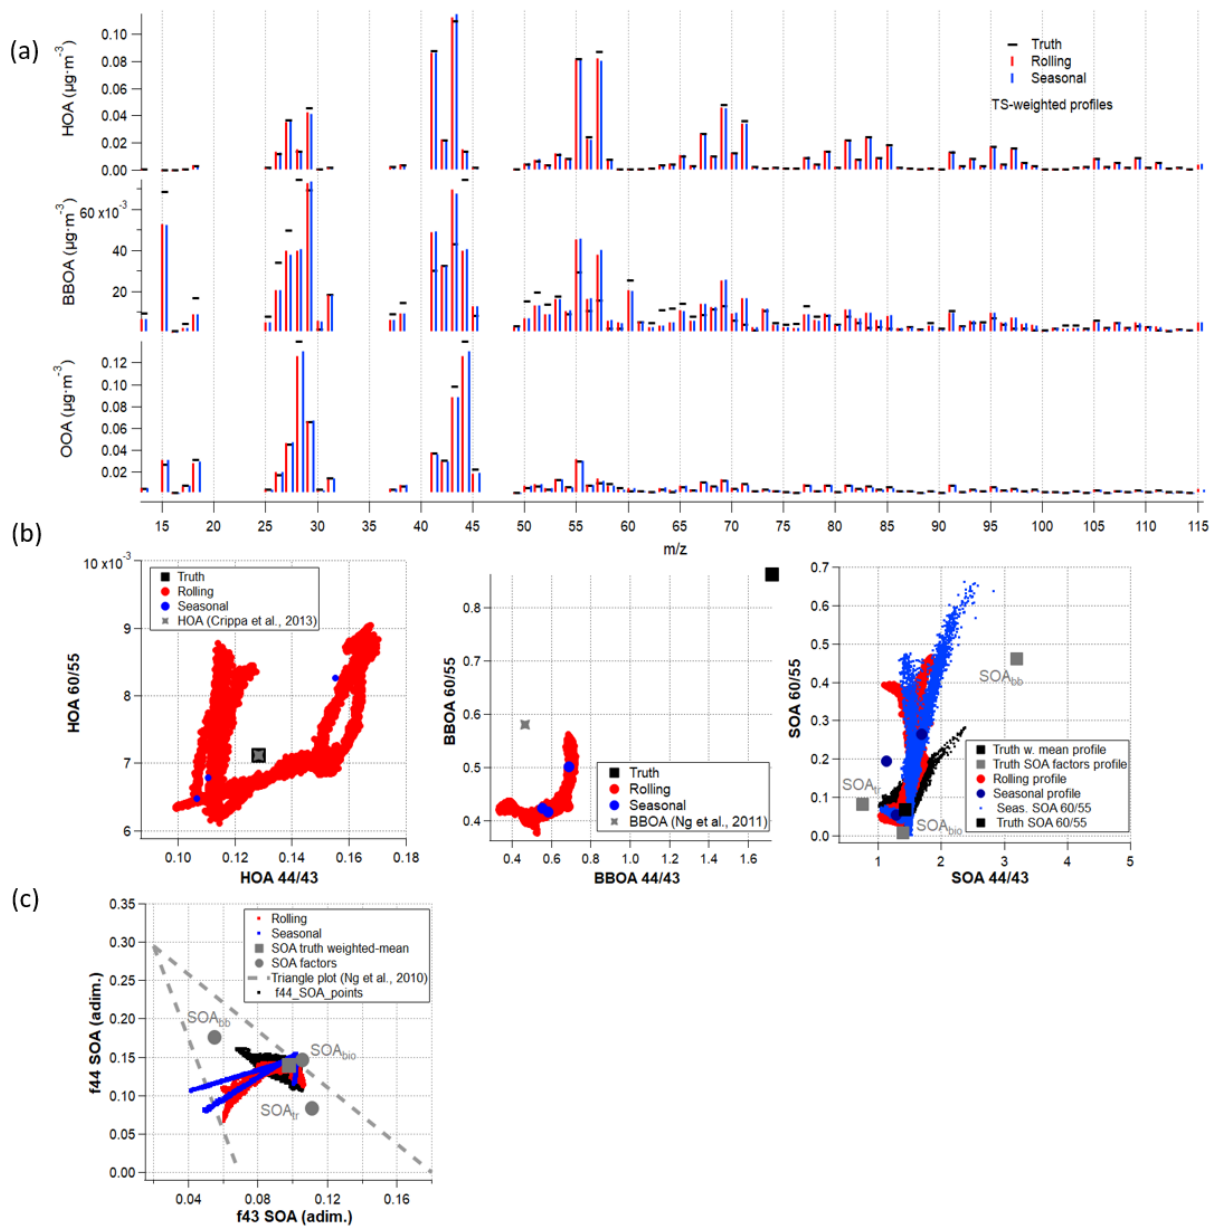

Figure R.2.4. Copy of Figure 3, improved as the reviewer suggested.
