# Supplementary material for: Rolling vs. Seasonal PMF: Real-world multi-site and synthetic dataset comparison
Source: Copernicus journal article supplement (doi:10.5194/egusphere-2022-269), 2022-05-30
Supplement: Supplementary file [file egusphere-2022-269-AC3-supplement.pdf]

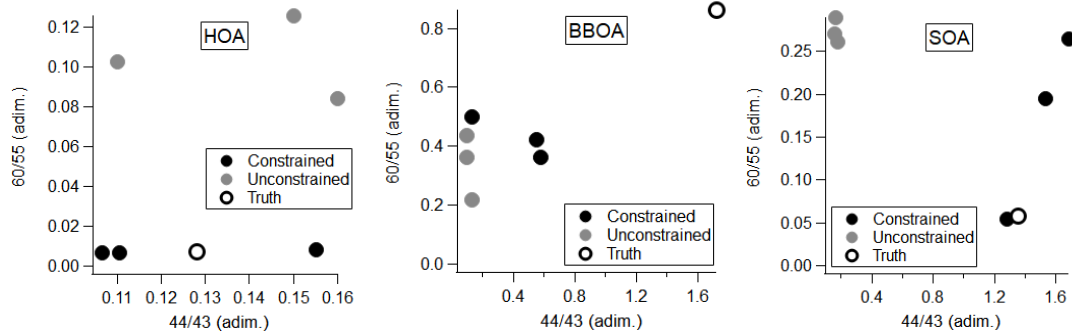

**Figure R3.1. Scatterplots of m/z60-to-m/z55 ratio vs. m/z44-to-m/z43 ratio for the three basic factors in the synthetic dataset for each season.**
